# Supplementary material for: Therapeutic Deep Brain Stimulation Disrupts Subthalamic Nucleus Activity Dynamics in Parkinsonian Mice
Source: bioRxiv or medRxiv preprint supplement (doi:10.1101/2021.11.12.468404), 2021-11-13
Supplement: Supplementary file [file media-1.pdf]

## Supplementary Figures

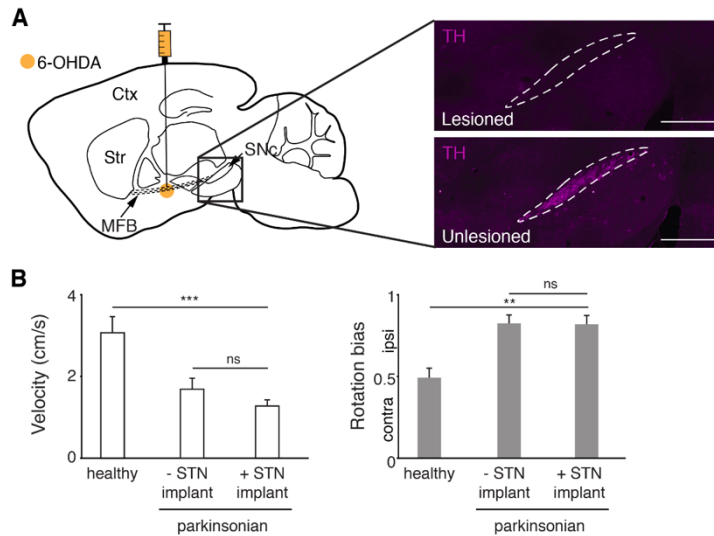

**Supplementary Figure 1. Related to Figure 1. Hemiparkinsonian mice show decreased movement velocity and ipsilesional rotation bias. (A)** Left: Sagittal schematic showing unilateral injection of 6-OHDA to deplete ipsilateral dopamine neurons. Right: Postmortem sagittal section showing depletion of TH (purple) in lesioned hemisphere (dotted lines indicate borders of substantia nigra, pars compacta; scale bar=500  $\mu$ m). **(B)** Comparison of average velocity (left) and rotation bias (right) in healthy mice (N=9 mice), hemiparkinsonian mice without STN implants (N=10 mice), and hemiparkinsonian mice with STN implants (N=9 mice). Statistical significance was determined using a Wilcoxon rank-sum test; \*\* $P < .01$ , \*\*\* $P < 0.001$  (see Supplementary Table 1 for detailed statistics). Bar plots show mean  $\pm$  SEM.

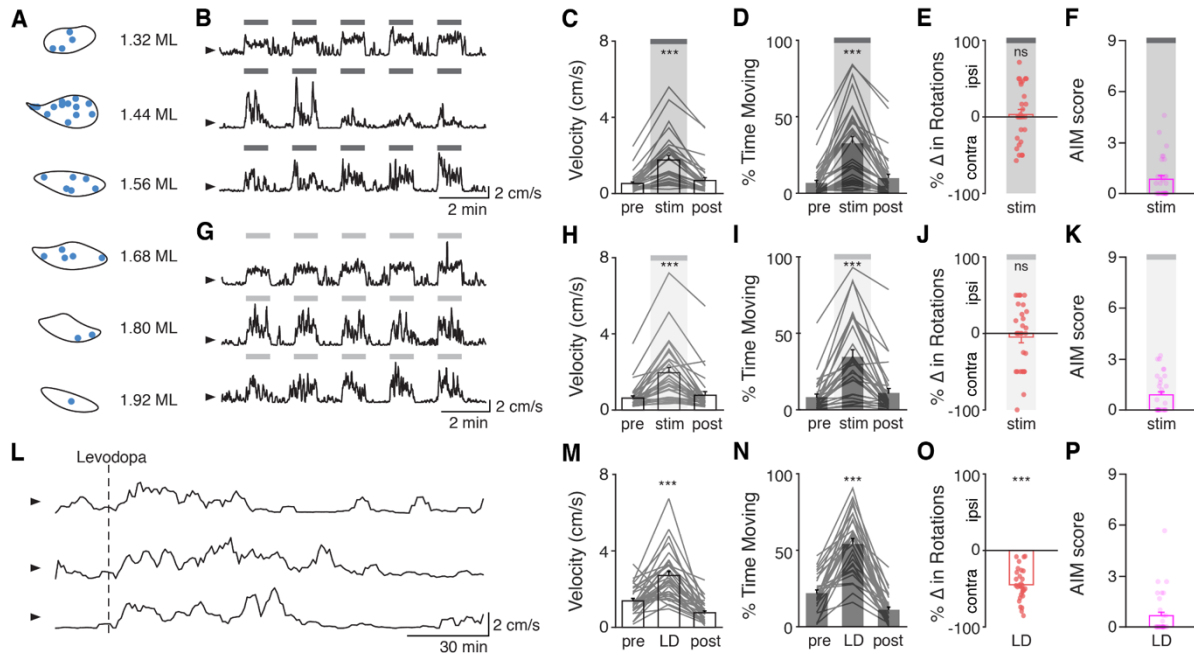

**Supplementary Figure 2. Related to Figures 2-4. STN DBS and levodopa produce similar behaviors in parkinsonian mice. (A)** Targeting of STN DBS electrodes to the STN in 32 mice. **(B)** Representative single-session velocities in response to 60 Hz STN DBS in 3 mice. **(C)** binned average velocity, **(D)** percent time moving, **(E)** change in rotational bias, and **(F)** dyskinesia in response to 60 Hz STN DBS (N=32 mice). **(G)** Representative single-session velocities in response to 100 Hz STN DBS in 3 mice. **(H)** binned average velocity, **(I)** percent time moving, **(J)** change in rotational bias, and **(K)** dyskinesia in response to 100 Hz STN DBS (N=31 mice). **(L)** Representative single-session velocities before and after levodopa injection (dotted line) in 3 mice. **(M)** binned average velocity, **(N)** percent time moving, **(O)** change in rotational bias, and **(P)** dyskinesia in response to levodopa injection (N=30 mice). Dyskinesia was quantified with as the abnormal involuntary movement (AIM) score. Statistical significance was determined using a Wilcoxon sign-rank test (E,I,O); a one-way repeated measures

ANOVA with a Tukey HSD post hoc analysis applied to correct for multiple comparisons (M-N); or a Friedman test with a Tukey HSD post hoc analysis applied to correct for multiple comparisons (C,D,H,I); \*\*\* $P < 0.001$  (For ANOVA/Friedman, only comparison between pre and stim/LD shown, see Supplementary Table 1 for detailed statistics). Arrowhead in velocity traces corresponds to 1 cm/s. Bar plots show mean  $\pm$  SEM.

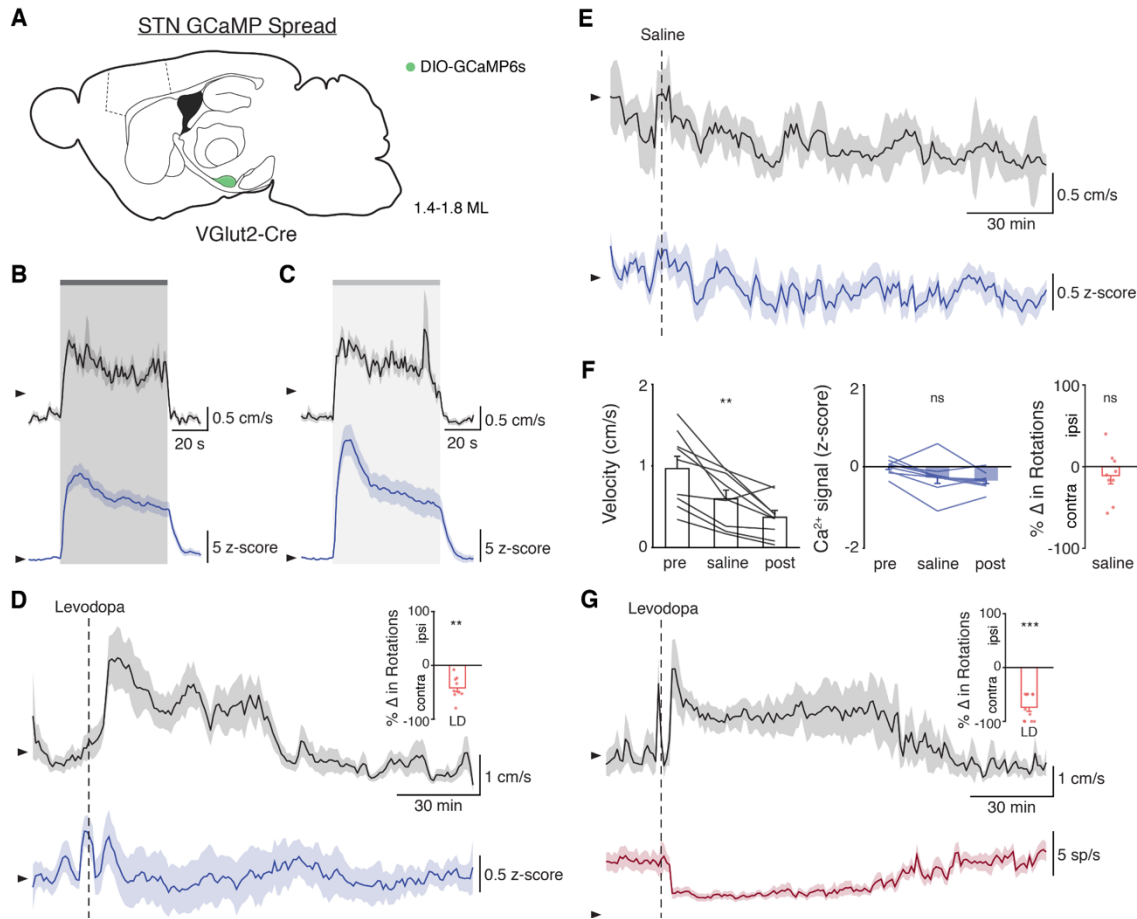

**Supplementary 3. Related to Figure 2. STN stimulation increases STN activity *in vivo*.** (A) Sagittal schematic showing estimated extent of viral GCaMP6s spread in the STN of VGlut2-Cre mice (N=9 mice). (B-C) Average movement velocity over time (black) and STN GCaMP signal (blue) following 60 Hz STN DBS (a, N=9 mice) or 100 Hz STN DBS (b, N=9 mice). (D) Average movement velocity over time (black) and STN GCaMP signal (blue) following administration of levodopa (N=9 mice) and average change in rotation bias during levodopa (inset). (E) Average movement velocity over time (black) and STN GCaMP signal (blue) following administration of saline (N=9 mice). (F) Average velocity (left), STN GCaMP signal (middle), and change in rotation bias before, during, and after saline injection (N=9 mice). (G) Average velocity over time (black) and STN

single-unit firing rate (red) following administration of levodopa (n=11 cells, N=3 mice) and average change in rotation bias during levodopa (inset). Statistical significance was determined using a Wilcoxon sign-rank test (D,F (right),G) or a one-way repeated measures ANOVA with a Tukey HSD post hoc analysis applied to correct for multiple comparisons (F (left, middle)); \*\* $P < 0.01$ , \*\*\* $P < 0.001$  (For ANOVA, only comparison between pre and saline shown, see Supplementary Table 1 for detailed statistics). Arrowhead in velocity, GCaMP, and single-unit electrophysiology traces corresponds to 1 cm/s, 0 z-score, and 0 sp/s, respectively. Velocity traces, GCaMP traces, single-unit electrophysiology traces, and bar plots show mean  $\pm$  SEM.

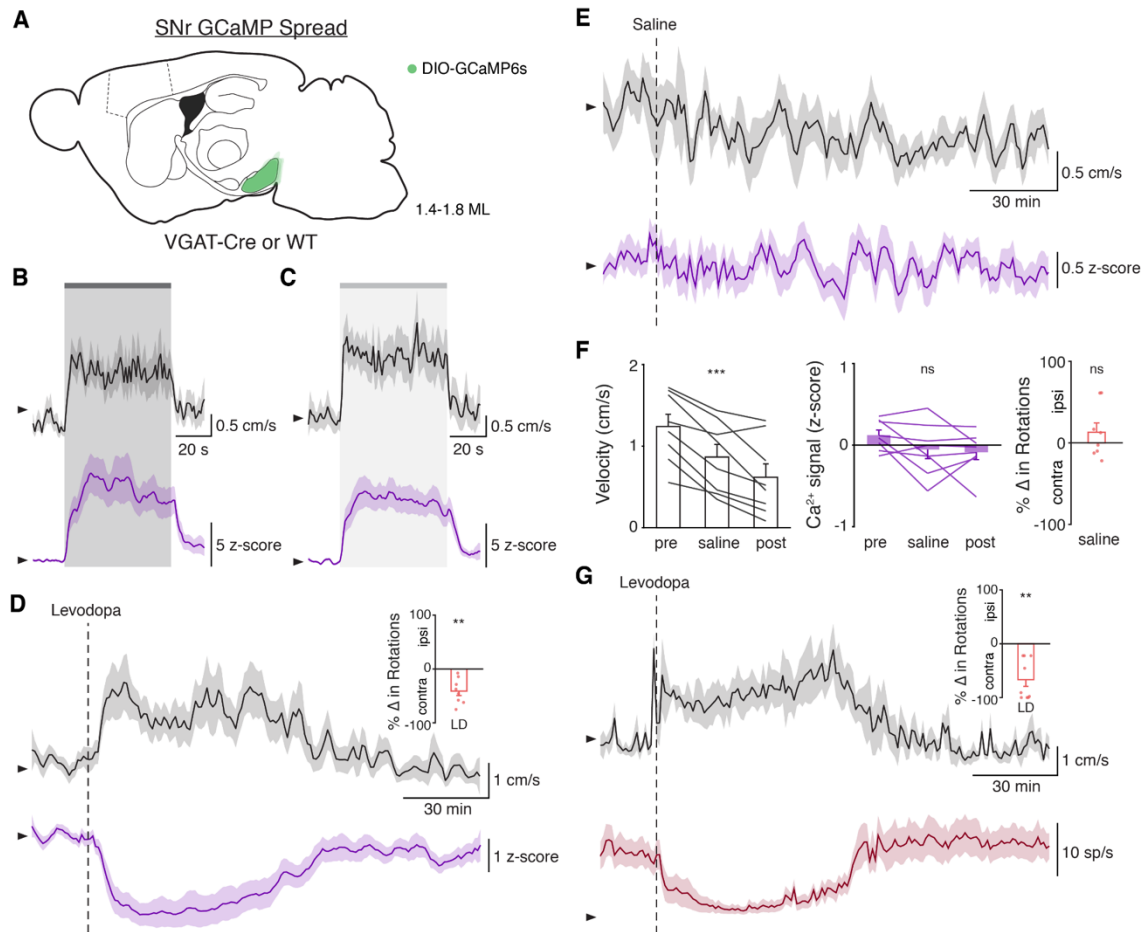

**Supplementary Figure 4. Related to Figure 3. STN DBS evokes a rapid increase in SNr activity.** (A) Sagittal schematic showing estimated extent of viral GCaMP6s spread in the SNr of VGAT-Cre or WT mice (N=8 mice). (B-C) Average velocity over time (black) and SNr GCaMP signal (purple) following 60 Hz STN DBS (a, N=7 mice) or 100 Hz STN DBS (b, N=7 mice). (D) Average velocity over time (black) and SNr GCaMP signal (purple) following administration of levodopa (N=8 mice) and average change in rotation bias during levodopa (inset). (E) Average velocity over time (black) and SNr GCaMP signal (purple) following administration of saline (N=8 mice). (F) Average velocity (left), SNr GCaMP signal (middle), and change in rotation bias before, during, and after saline injection (N=8 mice). (G) Average velocity over time (black) and SNr single-unit firing rate (red) following administration of levodopa (N=8 mice) and average change in rotation bias during levodopa (inset).

(red) following administration of levodopa (n=9 cells, N=3 mice) and average change in rotation bias during levodopa (inset). Statistical significance was determined using a Wilcoxon sign-rank test (D,F (right),G) or a one-way repeated measures ANOVA with a Tukey HSD post hoc analysis applied to correct for multiple comparisons (F (left, middle)); \*\* $P < 0.01$ , \*\*\* $P < 0.001$  (For ANOVA, only comparison between pre and saline shown, see Supplementary Table 1 for detailed statistics). Arrowhead in velocity, GCaMP, and single-unit electrophysiology traces corresponds to 1 cm/s, 0 z-score, and 0 sp/s, respectively. Velocity traces, GCaMP traces, single-unit electrophysiology traces, and bar plots show mean  $\pm$  SEM.

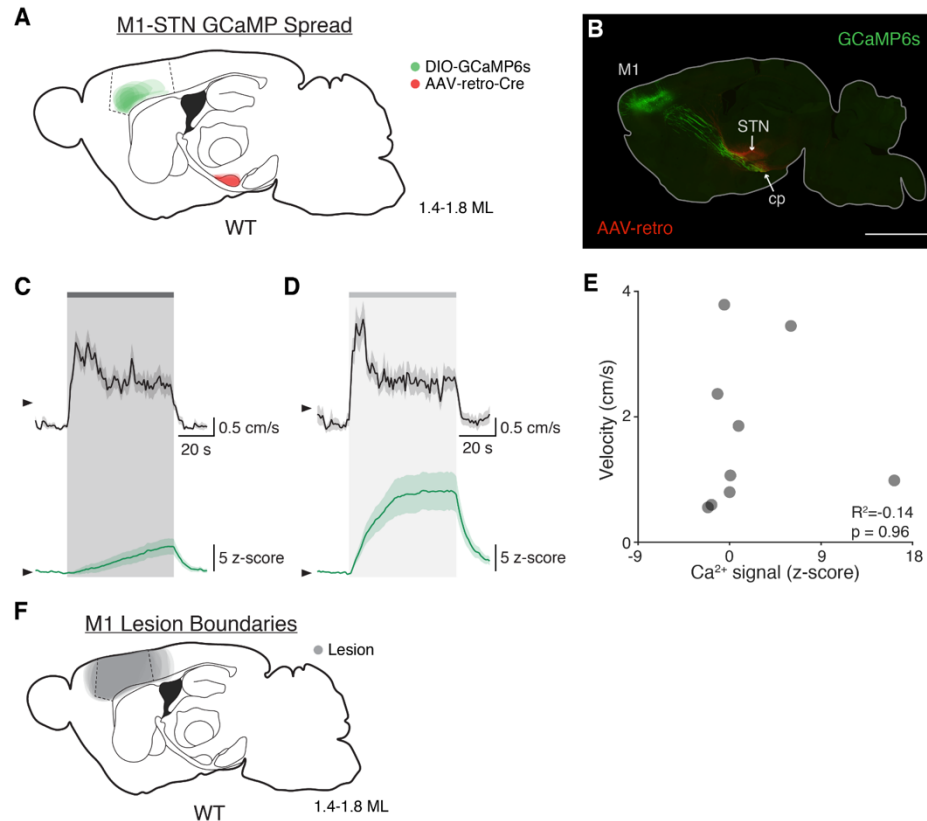

**Supplementary Figure 5. Related to Figure 4. STN DBS drives inconsistent and slow changes in hyperdirect M1 activity.** (A) Sagittal schematic showing estimated extent of viral AAV-retro and GCaMP6s spread in the STN and M1, respectively, of WT mice (N=9 mice). (B) Postmortem sagittal section example showing AAV-retro expression in the STN (red), resulting in GCaMP6s expression in M1 neurons (green) projecting to the STN and cerebral peduncle (cp). (C-D) Average velocity over time (black) and M1-STN GCaMP signal (green) following 60 Hz STN DBS (a, N=9 mice) or 100 Hz STN DBS (b, N=8 mice). (E) Scatter plot comparing hyperdirect M1 photometry signal to movement velocity during 60 Hz STN DBS (each dot represents average for one mouse, N=9 mice). (F) Sagittal schematic showing estimated extent of M1 lesions in WT mice (N=11 mice). Statistical significance was determined using a one-way ANOVA (see Supplementary



Table 1 for detailed statistics). Arrowhead in velocity traces and GCaMP traces corresponds to 1 cm/s and 0 z-score, respectively. Velocity and GCaMP traces show mean  $\pm$  SEM.

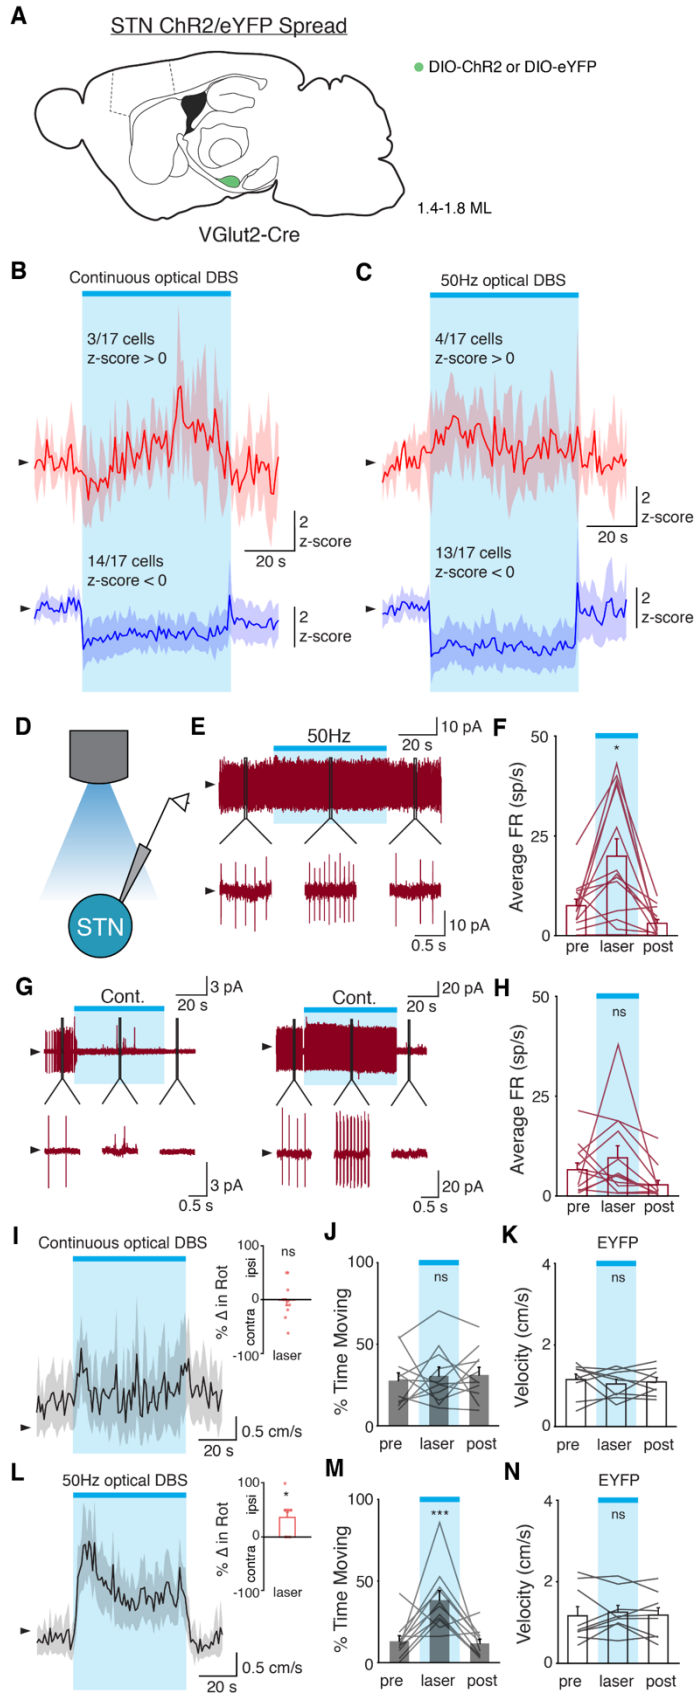

**Supplementary Figure 6. Related to Figure 7. *In vivo* and *ex vivo* optical STN stimulation produces distinct changes in firing rate.** (A) Sagittal schematic showing estimated extent of viral ChR2 or eYFP spread in the STN of VGlut2-Cre mice (N=20 mice). (B-C) Average *in vivo* firing rate of STN single units over time in response to continuous (B) or 50 Hz (C) optical stimulation (n=17 cells, N=3 mice), subdivided into neurons in which firing rate increased to greater than 0 z-score (top traces, red) and neurons in which firing rate decreased to less than 0 z-score (bottom traces, blue). (D) Recording configuration for *ex vivo* recordings of STN neurons in the cell-attached configuration. (E) Representative STN neuron before, during, and after 50 Hz optical stimulation. 1-second portions of the sweep are shown below. (F) Average firing rate before, during, and after 50 Hz optical stimulation (n=13 cells, N=3 mice). (G) Two STN neurons before, during, and after constant optical stimulation, demonstrating the variable response of neurons. 1-second portions of the sweep are shown below. (H) Average firing rate before, during, and after constant optical stimulation (n=13 cells, N=3 mice). (I) Average movement velocity and change in rotation bias (inset) in response to constant optical stimulation in ChR2 mice (N=11 mice). (J) Average percent time moving before, during, and after constant optical stimulation in ChR2 mice (N=11 mice). (K) Average movement velocity before, during, and after constant optical stimulation in mice injected with eYFP (N=9 mice). (L) Average movement velocity and change in rotation bias (inset) in response to 50 Hz optical stimulation in ChR2 mice (N=11 mice). (M) Average percent time moving before, during, and after 50 Hz optical stimulation in ChR2 mice (N=11 mice). (N) Average movement velocity before, during, and after 50 Hz optical stimulation in mice

injected with eYFP (N=9 mice). Statistical significance was determined using a one-way repeated measures ANOVA with a Tukey HSD post hoc analysis applied to correct for multiple comparisons;  $*P < 0.05$  (only comparison between pre and laser shown, see Supplementary Table 1 for detailed statistics). Arrowhead in firing rate, cell-attached, and velocity traces corresponds to 0 z-score, 0 pA, and 1 cm/s, respectively. Firing rate traces, velocity traces, and bar plots show mean  $\pm$  SEM.

## Supplementary Tables

| Figure | Part      | Test    | P-value (stim/las)                    | P-value (pre vs p) | P-value (stim/las) | doF (ANOVA) | F-value (ANOVA)  | Cohen's d |
|--------|-----------|---------|---------------------------------------|--------------------|--------------------|-------------|------------------|-----------|
| 2      | D (fib)   | rmANOVA | 1.19E-07                              | 8.03E-01           | 1.19E-07           | 2.8         | 60.057           | 1.83      |
| 2      | D (vel)   |         | 7.11E-09                              | 9.96E-01           | 1.09E-09           | 2.8         | 57.668           | 1.74      |
| 2      | F (fib)   |         | 9.54E-07                              | 4.27E-01           | 4.17E-07           | 2.8         | 37.391           | 1.61      |
| 2      | F (vel)   |         | 1.11E-09                              | 9.96E-01           | 1.09E-09           | 2.8         | 66.612           | 1.79      |
| 2      | H (fib)   |         | 9.04E-01                              | 8.06E-01           | 8.34E-01           | 2.8         | 0.27308          |           |
| 2      | H (vel)   |         | 1.66E-03                              | 8.75E-03           | 1.02E-05           | 2.8         | 27.391           | 1.43      |
| 2      | J (spike) |         | 2.89E-02                              | 9.97E-01           | 5.03E-03           | 2.10        | 11.046           | 1.54      |
| 2      | J (vel)   |         | 3.13E-04                              | 1.25E-01           | 1.77E-05           | 2.10        | 39.742           | 2.11      |
| 3      | C (fib)   |         | 4.14E-05                              | 9.98E-01           | 4.18E-05           | 2.6         | 25.567           | 1.66      |
| 3      | C (vel)   |         | 1.33E-05                              | 1.70E-01           | 6.55E-06           | 2.6         | 41.02            | 0.76      |
| 3      | E (fib)   |         | 3.32E-05                              | 1.11E-01           | 9.04E-05           | 2.6         | 24.39            | 1.78      |
| 3      | E (vel)   |         | 4.99E-06                              | 4.10E-01           | 9.82E-07           | 2.6         | 27.097           | 0.78      |
| 3      | G (fib)   |         | 6.68E-06                              | 4.57E-03           | 1.24E-04           | 2.7         | 40.141           | 5.01      |
| 3      | G (vel)   |         | 1.56E-02                              | 5.13E-04           | 2.25E-04           | 2.7         | 18.622           | 1.14      |
| 3      | I (spike) |         | 1.21E-02                              | 3.79E-01           | 9.49E-03           | 2.8         | 15.221           | 1.87      |
| 3      | I (vel)   |         | 1.28E-03                              | 8.38E-01           | 1.62E-04           | 2.8         | 37.4             | 2.84      |
| 4      | C (fib)   |         | 8.37E-02                              | 9.54E-02           | 1.11E-01           | 2.8         | 4.5518           |           |
| 4      | C (vel)   |         | 1.51E-09                              | 8.72E-01           | 1.18E-09           | 2.8         | 66.475           | 1.51      |
| 4      | E (fib)   |         | 5.88E-05                              | 1.76E-02           | 6.47E-05           | 2.7         | 23.021           | 1.17      |
| 4      | E (vel)   |         | 4.14E-07                              | 5.73E-01           | 6.95E-07           | 2.7         | 30.395           | 1.49      |
| 5      | C         |         | 8.24E-03                              | 8.24E-01           | 5.48E-03           | 2.10        | 10.579           | 0.67      |
| 6      | D (high)  |         | 1.48E-11                              |                    |                    |             |                  | 3.27      |
| 6      | D (low)   | WRS     | 5.42E-01                              |                    |                    |             |                  |           |
| 7      | C         | rmANOVA | 2.46E-02                              | 1.36E-01           | 6.89E-01           | 2.16        | 4.3163           | 0.10      |
| 7      | E         |         | 2.40E-02                              | 9.97E-01           | 4.57E-02           | 2.16        | 5.5241           | 0.11      |
| 7      | F         | WRS     | 5.13E-01                              |                    |                    |             |                  |           |
| 7      | G         |         | 3.88E-02                              |                    |                    |             |                  | 0.81      |
| 7      | I         | rmANOVA | 2.96E-01                              | 2.45E-01           | 9.87E-01           | 2.10        | 1.7004           |           |
| 7      | K         |         | 1.27E-08                              | 4.84E-01           | 1.30E-09           | 2.10        | 51.586           | 1.41      |
| S1     | B (rot)   | WRS     | 0.0014 (healthy vs (PD-STN vs PD+STN) |                    |                    |             |                  |           |
| S1     | B (vel)   |         | 0.0000823 (health (PD-STN vs PD+STN)  |                    |                    |             |                  |           |
| S2     | C         | FT      | 3.92E-09                              | 6.08E-01           | 7.41E-07           | 2           | 216.1956 (chi^2) |           |
| S2     | D         |         | 3.53E-09                              | 5.28E-01           | 1.29E-06           | 2           | 214.4129 (chi^2) |           |
| S2     | E         | WRS     | 7.15E-01                              |                    |                    |             |                  |           |
| S2     | H         | FT      | 5.53E-08                              | 7.87E-01           | 2.01E-06           | 2           | 189.3723 (chi^2) |           |
| S2     | I         |         | 1.46E-08                              | 5.39E-01           | 4.70E-06           | 2           | 195.1556 (chi^2) |           |
| S2     | J         | WRS     | 4.68E-01                              |                    |                    |             |                  |           |
| S2     | M         | rmANOVA | 9.69E-10                              | 5.11E-07           | 9.56E-10           | 2.29        | 92.27            |           |
| S2     | N         |         | 9.56E-10                              | 2.02E-08           | 9.56E-10           | 2.29        | 164.19           |           |
| S2     | O         | WRS     | 1.73E-06                              |                    |                    |             |                  |           |
| S3     | D         | rmANOVA | 3.91E-03                              |                    |                    |             |                  |           |
| S3     | F (fib)   |         | 8.38E-02                              | 1.18E-03           | 8.13E-01           | 2.8         | 5.6691           |           |
| S3     | F (rot)   |         | 2.89E-01                              |                    |                    |             |                  |           |
| S3     | F (vel)   | rmANOVA | 1.15E-03                              | 1.41E-04           | 9.63E-03           | 2.8         | 22.701           |           |
| S3     | G         |         | 9.77E-04                              |                    |                    |             |                  |           |
| S4     | D         | rmANOVA | 7.81E-03                              |                    |                    |             |                  |           |
| S4     | F (fib)   |         | 3.07E-01                              | 2.65E-01           | 9.64E-01           | 2.7         | 1.6116           |           |
| S4     | F (rot)   |         | 5.47E-01                              |                    |                    |             |                  |           |
| S4     | F (vel)   | rmANOVA | 4.66E-05                              | 2.04E-04           | 2.64E-02           | 2.7         | 24.425           |           |
| S4     | G         |         | 3.91E-03                              |                    |                    |             |                  |           |
| S5     | E         | ANOVA   | 9.60E-01                              |                    |                    |             | 0.00336          |           |
| S6     | F         | rmANOVA | 3.26E-02                              | 2.68E-02           | 6.86E-03           | 2.12        | 11.298           |           |
| S6     | H         |         | 6.26E-01                              | 5.81E-03           | 7.39E-02           | 2.12        | 3.6871           |           |
| S6     | I         | WRS     | 8.10E-01                              |                    |                    |             |                  |           |
| S6     | J         | rmANOVA | 6.53E-01                              | 4.55E-01           | 9.77E-01           | 2.10        | 0.75399          |           |
| S6     | K         |         | 6.64E-01                              | 9.31E-01           | 9.08E-01           | 2.8         | 0.31701          |           |
| S6     | L         | WRS     | 1.60E-02                              |                    |                    |             |                  |           |
| S6     | M         | rmANOVA | 5.56E-09                              | 7.33E-01           | 1.07E-09           | 2.10        | 52.8             |           |
| S6     | N         |         | 8.14E-01                              | 9.94E-01           | 8.21E-01           | 2.8         | 0.22566          |           |

**Supplementary Table 1.** Full statistical results for the indicated figures.

rmANOVA=one-way repeated measures Analysis of Variance with post-hoc Tukey multiple-comparisons test. WRS=Wilcoxon Rank Sum test (Mann-Whitney U test).

FT=Friedman's test with post-hoc Tukey multiple-comparisons test. WSR=Wilcoxon Signed-Ranks test.

| <b>Current Amplitude<br/>(<math>\mu</math>A)</b> | <b>Frequency<br/>(Hz)</b> | <b>Pulse Width<br/>(<math>\mu</math>s)</b> | <b>High vs Low<br/>Effect</b> |
|--------------------------------------------------|---------------------------|--------------------------------------------|-------------------------------|
| 200                                              | 60                        | 60                                         | High                          |
| 200                                              | 60                        | 100                                        | High                          |
| 200                                              | 80                        | 60                                         | High                          |
| 200                                              | 100                       | 60                                         | High                          |
| 200                                              | 120                       | 60                                         | High                          |
| 200                                              | 140                       | 60                                         | High                          |
| 200                                              | 160                       | 60                                         | High                          |
| 225                                              | 80                        | 80                                         | High                          |
| 175                                              | 20                        | 50                                         | Low                           |
| 200                                              | 10                        | 120                                        | Low                           |
| 200                                              | 120                       | 20                                         | Low                           |
| 300                                              | 10                        | 60                                         | Low                           |
| 400                                              | 1                         | 120                                        | Low                           |

**Supplementary Table 2. Related to Figure 6.** Stimulation parameters used in assessing differences between high and low effect stimulation.
